# Supplementary material for: Vitamin D exposure and Risk of Breast Cancer: a meta-analysis
Source: PubMed Central journal article supplement (PMC5997996; doi:10.1038/s41598-018-27297-1), 2018-06-13

**Full title: Vitamin D exposure and Risk of Breast Cancer: a meta-analysis**

**Short title: Vitamin D exposure and breast cancer**

**Authors:**

Nuria Estébanez <sup>1</sup>, Inés Gómez-Acebo<sup>1,2</sup>, Camilo Palazuelos<sup>1,2</sup>, Javier Llorca<sup>1,2</sup>, Trinidad Dierssen-Sotos<sup>1,2</sup>.

**Affiliations:**

1: University of Cantabria – IDIVAL, Santander, Spain.

2: CIBER Epidemiología y Salud Pública (CIBERESP), Madrid, Spain

**Corresponding author:**

Trinidad Dierssen-Sotos

Medicina Preventiva y Salud Pública

Facultad de Medicina

Avda. Herrera Oria s/n

39011 Santander

Cantabria

Phone #34-942201993/ Fax #34-942201903

E-mail: [dierssent@unican.es](mailto:dierssent@unican.es)

**Supplementary table 1.** - Results of global case-control studies versus nested case-control studies on the relationship between vitamin D and breast cancer

| Exposition                                      | Group          | OR case-control and nested case control studies.<br>Number of studies included | OR nested case-control studies.<br>Number of studies included    |
|-------------------------------------------------|----------------|--------------------------------------------------------------------------------|------------------------------------------------------------------|
| 25(OH)D                                         | All            | 0.65 (0.56-0.76)<br>N=29                                                       | 0.92 (0.84-1.01)<br>N=14                                         |
|                                                 | ER+            | 0.98 (0.85-1.13)<br>N=5                                                        | 0.98 (0.85-1.13)<br>N=4                                          |
|                                                 | ER -           | 0.86(0.64-1.15)<br>N=5                                                         | 0.94 (0.76-1.18)<br>N=4                                          |
|                                                 | Postmenopausal | 0.74 (0.59-0.93)<br>N=19                                                       | 0.97 (0.82-1.14)<br>N=12                                         |
|                                                 | Premenopausal  | 0.63(0.49-0.80)<br>N=9                                                         | 0.67 (0.49-0.92)<br>N=4                                          |
| Dietary vitamin D                               | All            | 0.91 (0.72-1.17)<br>N=8                                                        | 2.79(0.85-9.15)<br>N=1                                           |
|                                                 | Postmenopausal | 0.78(0.68-0.90)<br>N=4                                                         | NO STUDIES                                                       |
|                                                 | Premenopausal  | 0.65(0.52-0.82)<br>N=5                                                         | NO STUDIES                                                       |
| Vitamin D supplement                            | All            | 0.78(0.63-0.98)<br>N=5                                                         | NO STUDIES                                                       |
|                                                 | Postmenopausal | 0.69 (0.34-1.41)<br>N=2                                                        | 0.82 (0.49-1.35)<br>N=5 ( <i>five populations in 1 article</i> ) |
| Total Vitamin D intake ( dietary + supplements) | All            | 0.84 (0.68-1.05)<br>N=4                                                        | NO STUDIES                                                       |

Supplementary fig. 1a. Funnel plot for cases control studies 25(OH)D and breast cancer

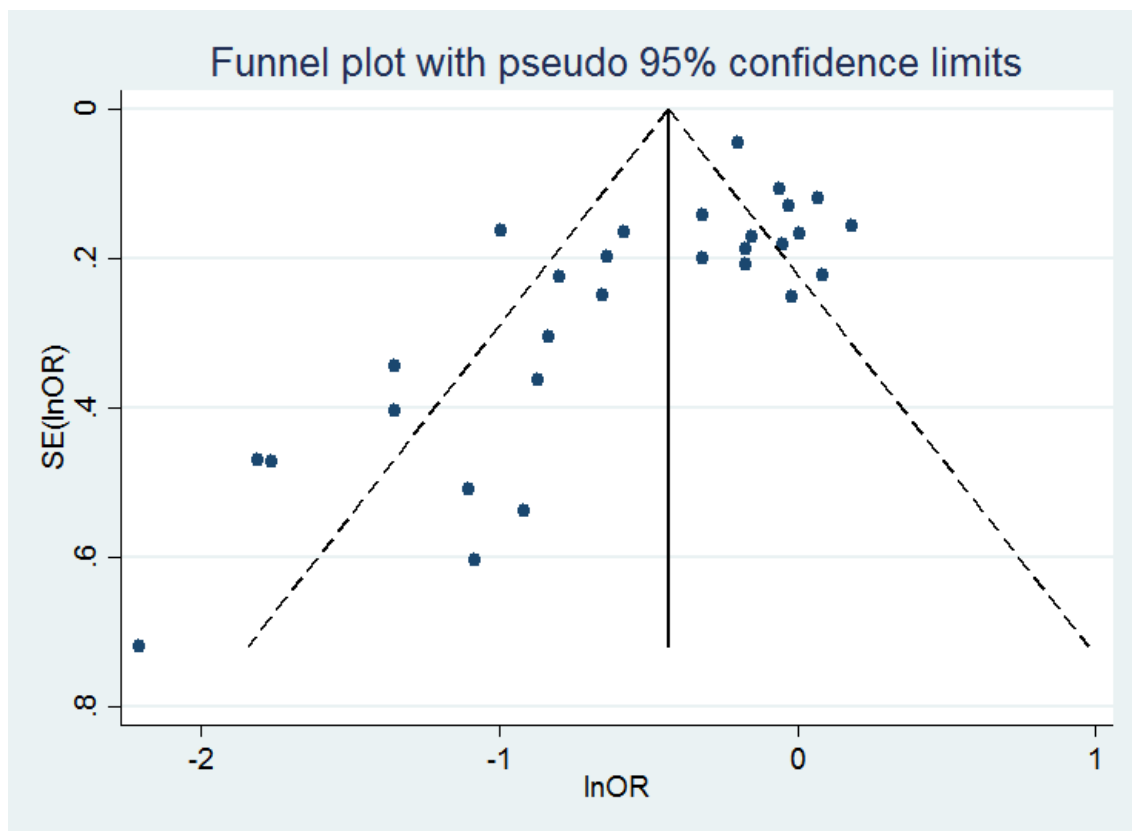

**Supplementary fig. 1b.** Funnel plot for nested cases control studies 25(OH)D and breast cancer

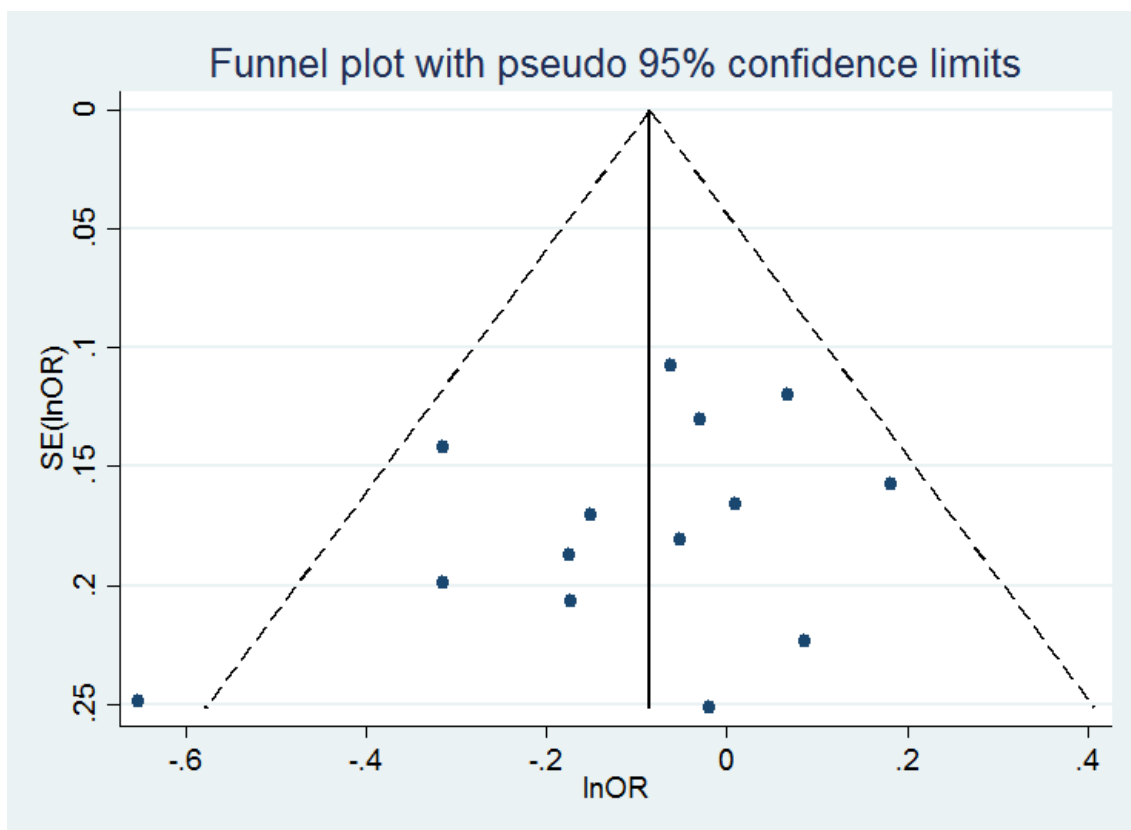

**Supplementary fig. 2a.** Forest plot for the relationship between dietary vitamin D and breast cancer in case control studies

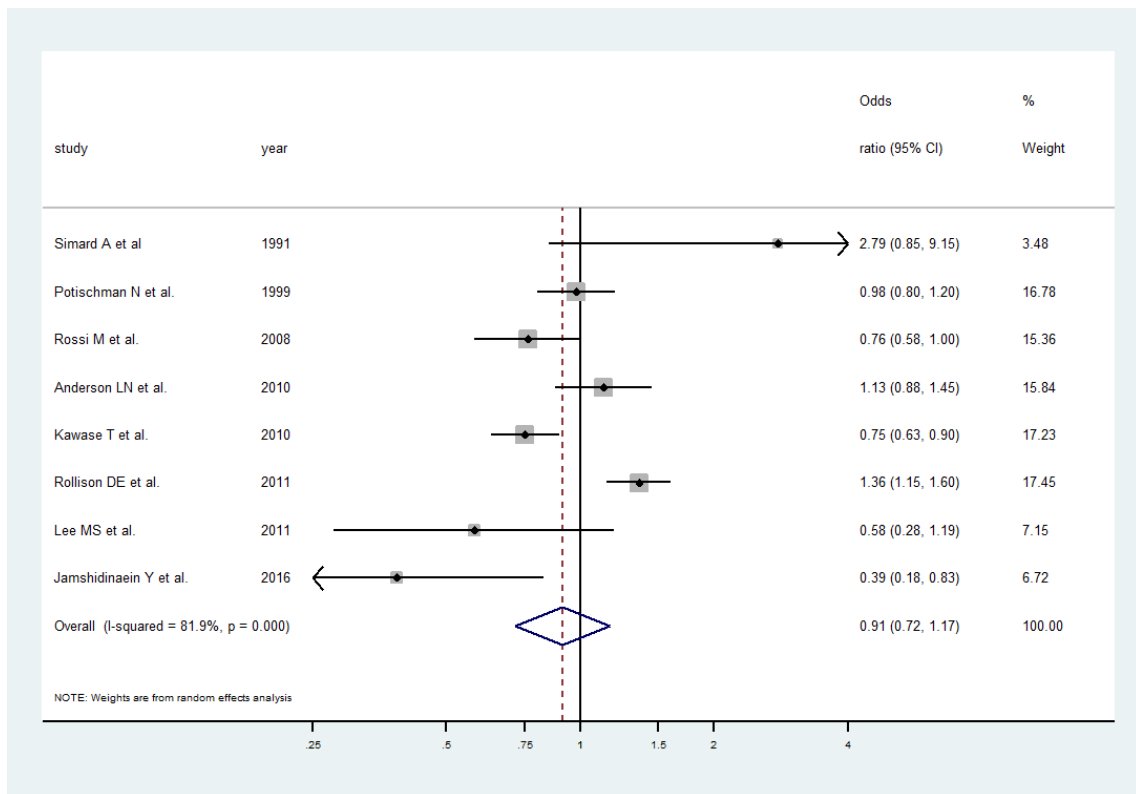

**Supplementary fig. 2b.** Forest plot for the relationship between dietary vitamin D and breast cancer in cohort studies

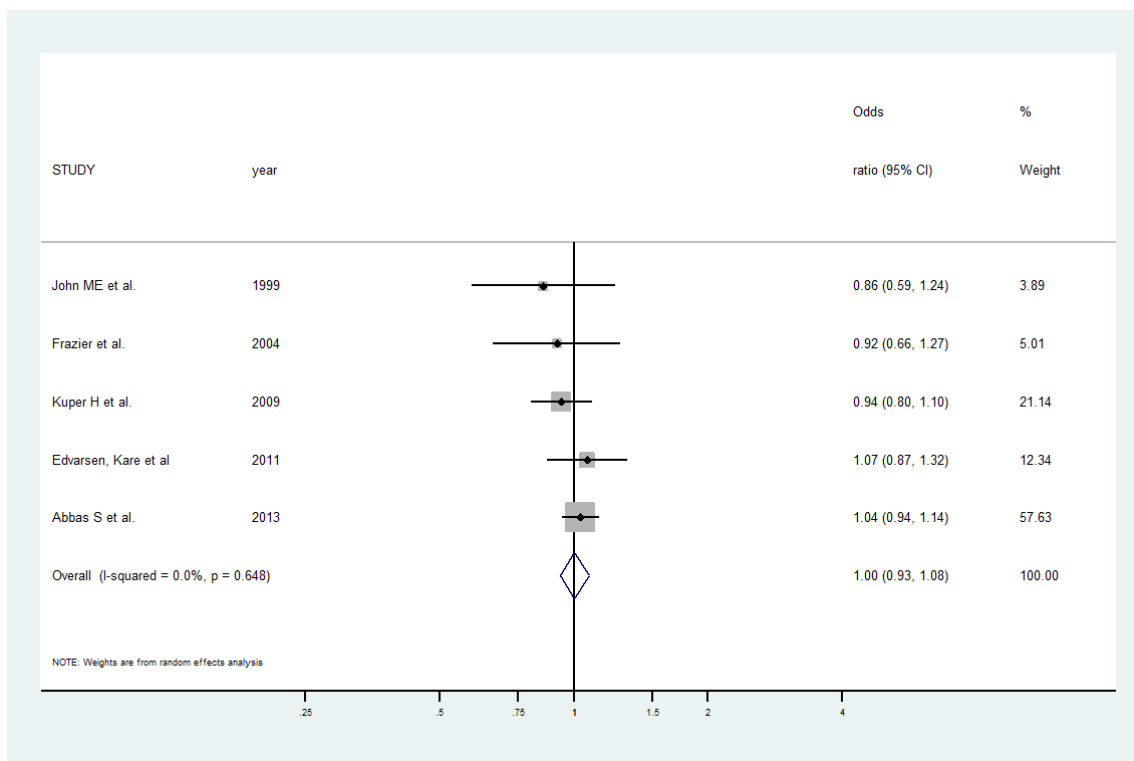

Supplement: 41598_2018_27297_MOESM1_ESM.pdf [file 41598_2018_27297_MOESM1_ESM.pdf]
